# Supplementary material for: Chronic Kidney Disease: Interaction of Adiponectin Gene Polymorphisms and Diabetes
Source: MDPI journal article supplement (doi:10.3390/ijms24098128), 2023-05-01
Supplement: s1 [file s1]

## Supplementary Table

Supplementary Table S1. Validity and reliability of urinary arsenic species, plasma selenium, and red blood cell lead and cadmium.

| Metals or metalloids                               | Method                                                                                  | Detection limit ( $\mu\text{g/L}$ ) | Recovery rate | SRM                                                                                                                                                                                                         | CV   |
|----------------------------------------------------|-----------------------------------------------------------------------------------------|-------------------------------------|---------------|-------------------------------------------------------------------------------------------------------------------------------------------------------------------------------------------------------------|------|
| Plasma selenium                                    | Inductively coupled plasma mass spectrometry                                            | 0.193                               |               | SRMs (Seronorm Trace Elements Whole Blood L-2; SERO AS, Norway) contained $112 \pm 46$ mg/L of selenium, in our system $118.7 \pm 11.1$ mg/L ( $n = 7$ )                                                    | 9.8% |
| Red blood cell lead                                | Inductively coupled plasma mass spectrometry                                            | 0.32                                |               | SRMs [Seronorm Trace Elements Whole Blood L-2 (Lot 1103129)] certificate value $310.0$ $\mu\text{g/L}$ (range $186.0$ – $434.0$ $\mu\text{g/L}$ ), in our system $329.0 \pm 17.0$ $\mu\text{g/L}$           | <10% |
| Red blood cell cadmium                             | Inductively coupled plasma mass spectrometry                                            | 0.07                                |               | SRMs [Seronorm Trace Elements Whole Blood L-2 (Lot 1103129)] certificate value $5.8$ $\mu\text{g/L}$ (range: $5.4$ – $6.2$ $\mu\text{g/L}$ ), in our system $6.1 \pm 0.5$ $\mu\text{g/L}$                   | <10% |
| Arsenite ( $\text{As}^{\text{III}}$ )              | High-performance liquid chromatography–hydride generator–atomic absorption spectrometry | 0.02                                | 93.8–102.2%   | SRM (National Institute of Standards and Technology, NIST; Gaithersburg, MD) 2670 certificate value $480 \pm 100$ $\mu\text{g/L}$ inorganic arsenic, in our system $507 \pm 17$ $\mu\text{g/L}$ ( $n = 4$ ) | <10% |
| Arsenate ( $\text{As}^{\text{V}}$ )                |                                                                                         | 0.10                                |               |                                                                                                                                                                                                             |      |
| Monomethylarsonic acid ( $\text{MMA}^{\text{V}}$ ) |                                                                                         | 0.07                                |               |                                                                                                                                                                                                             |      |
| Dimethylarsinic acid ( $\text{DMA}^{\text{V}}$ )   |                                                                                         | 0.06                                |               |                                                                                                                                                                                                             |      |

(A)

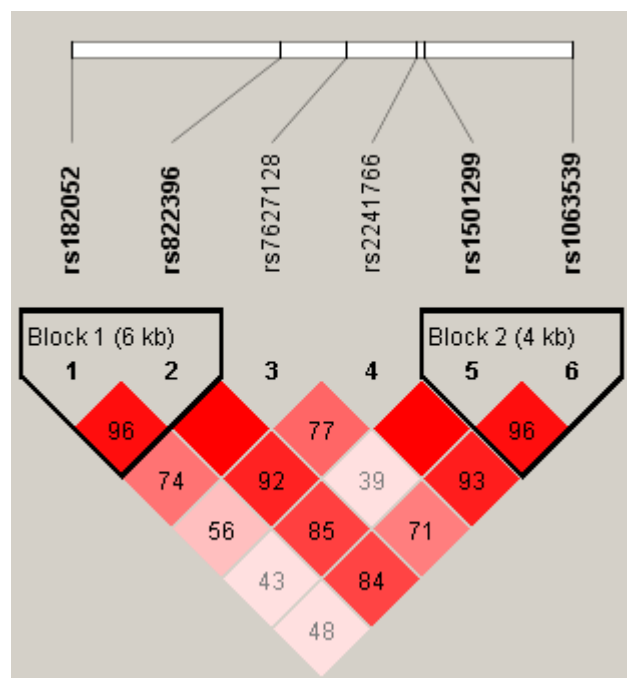

(B)

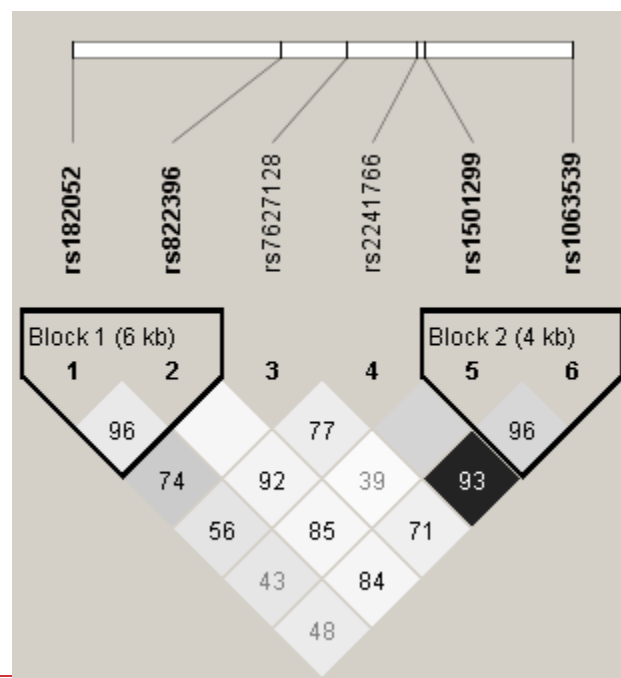

Figure S1. (A) Lewontin's  $D'$  of *ADIPOQ* block 1 (*ADIPOQ* rs182052 and *ADIPOQ* rs822396), *ADIPOQ* block 2 (*ADIPOQ* rs1501299 and *ADIPOQ* rs1063539) polymorphisms. (B)  $r^2$  values for each pair of polymorphisms of *ADIPOQ*.

Supplementary Table S2. Haplotypes of *ADIPOQ* genes and the risk of CKD

| Haplotypes of <i>ADIPOQ</i>                                  | CKD cases<br>(N= 218) | Controls<br>(N = 427) | Age-sex adjusted<br>ORs (95% CI) | Multivariate adjusted<br>ORs (95% CI) <sup>a</sup> |
|--------------------------------------------------------------|-----------------------|-----------------------|----------------------------------|----------------------------------------------------|
| <i>ADIPOQ</i> block 1: <i>ADIPOQ</i> rs182052 and rs822396   |                       |                       |                                  |                                                    |
| G-A                                                          | 206 (49.28)           | 372 (45.59)           | 1.00                             | 1.00                                               |
| A- A                                                         | 166 (39.71)           | 357 (43.75)           | 0.84 (0.65–1.08)                 | 0.78 (0.57–1.05) <sup>+</sup>                      |
| G-G or A-G                                                   | 46 (11.01)            | 87 (10.66)            | 0.95 (0.64–1.41)                 | 0.90 (0.56–1.45)                                   |
| <i>ADIPOQ</i> block 2: <i>ADIPOQ</i> rs1501299 and rs1063539 |                       |                       |                                  |                                                    |
| G-G                                                          | 175 (41.87)           | 346 (42.40)           | 1.00                             | 1.00                                               |
| G-C                                                          | 126 (30.14)           | 246 (30.15)           | 1.02 (0.77–1.35)                 | 0.94 (0.67–1.31)                                   |
| T-G or T-C                                                   | 117 (27.99)           | 224 (27.45)           | 1.04 (0.78–1.39)                 | 0.96 (0.68–1.36)                                   |

Abbreviations: *ADIPOQ*, adiponectin; OR, odds ratio; CI, confidence interval.

In haplotype blocks 1 and 2, there are 18 alleles missing in cases and 38 alleles missing in controls.

<sup>a</sup> Adjusted for age, gender, educational level, analgesic usage, disease histories of diabetes and hypertension, and alcohol, coffee, and tea consumption.

<sup>+</sup>0.05 ≤ *p* < 0.1.
